# Supplementary material
Source: PubMed Central journal article supplement (PMC3406696)

## **Supplemental Figure Legends**

**Figure S1.** Western blot analysis of PKC $\alpha$  after reintroducing FADD into FADD $^{-/-}$  MEFs. Cells were transfected with empty or FLAG-FADD plasmids for 24 h and then treated with the indicated concentrations of PMA for 12 h.

**Figure S2.** The PKC $\beta$ II plasmid was overexpressed with or without the PP2Ac plasmid for 24 h in 293T cells. Cells were fractionated into the detergent-soluble supernatant (S) and detergent-insoluble pellet (P).

**Figure S3.** Phospho-TM and phospho-HM determined using western blot analysis. Similar protein levels of PKC $\beta$ II were immunoprecipitated which was determined by HA antibody.

**Figure S4.** Western blot analysis of PKC $\beta$ II, PKC $\delta$  and pERK in cytosolic extracts of cardiac muscle from control littermates (L) and FADD-D mice (D). Representative results from 10 pairs of mice are shown.

**Figure S5.** Transwell assay of FADD $^{+/+}$  and FADD $^{-/-}$  MEFs. Represent results of Figure 7C.

**Figure S6.** Transwell assay of wild type (WT) and FADD-D MEFs. Represent results of Figure 8C

**Figure S7.** A schematic diagram illustrating how FADD and its phosphorylation regulate cytoskeleton and cell motility via PKC signaling. FADD is required for PP2A interacts with PKC $\alpha$  to reduce cPKC TM and HM phosphorylation. When FADD is deficient or phosphorylated, the interaction between cPKC and PP2A is impaired. As a result, endogenous cPKC

S

Figure S1.

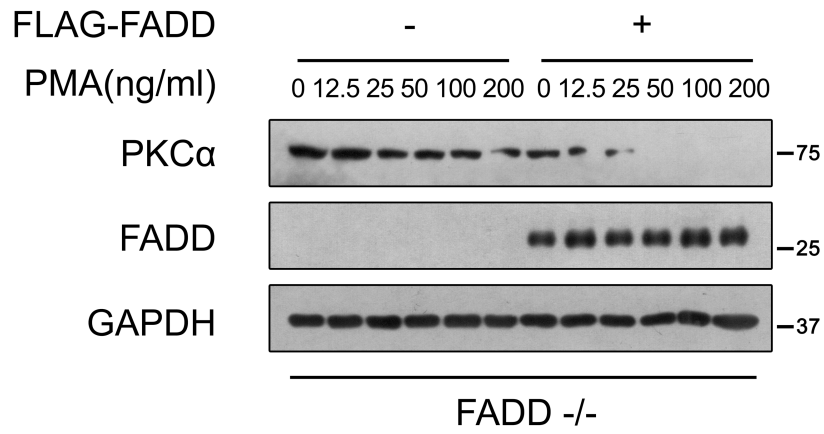

Figure S2.

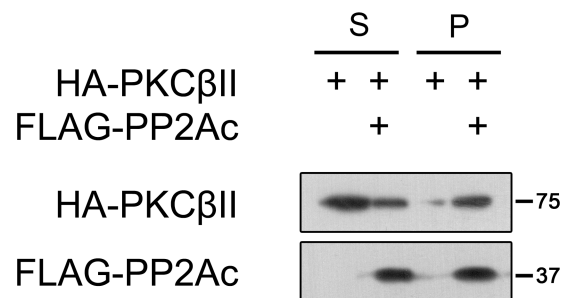

Figure S3.

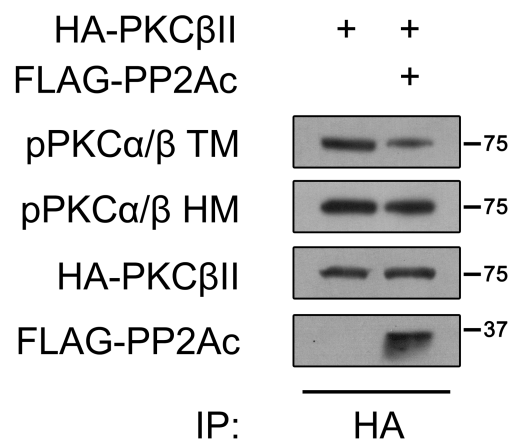

Figure S4.

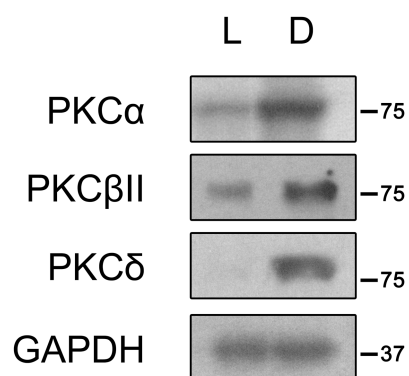

Figure S5.

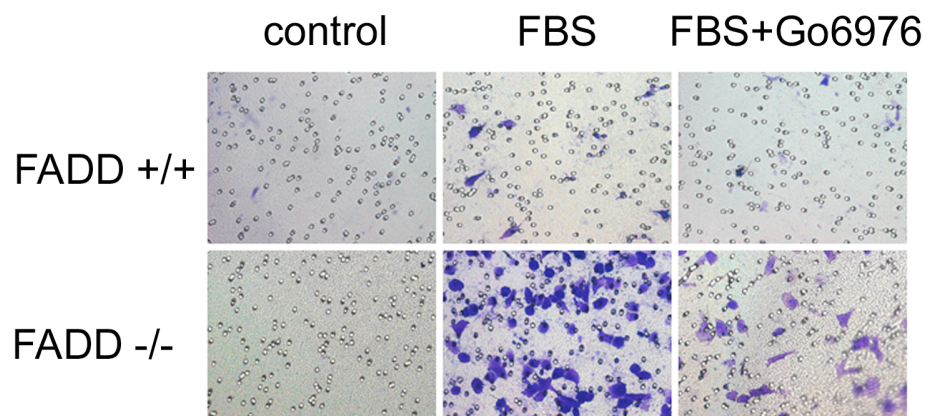

Figure S6.

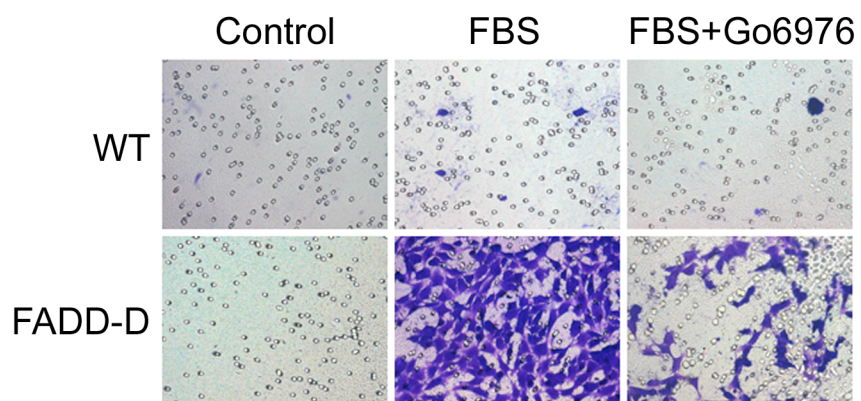

Figure S7.

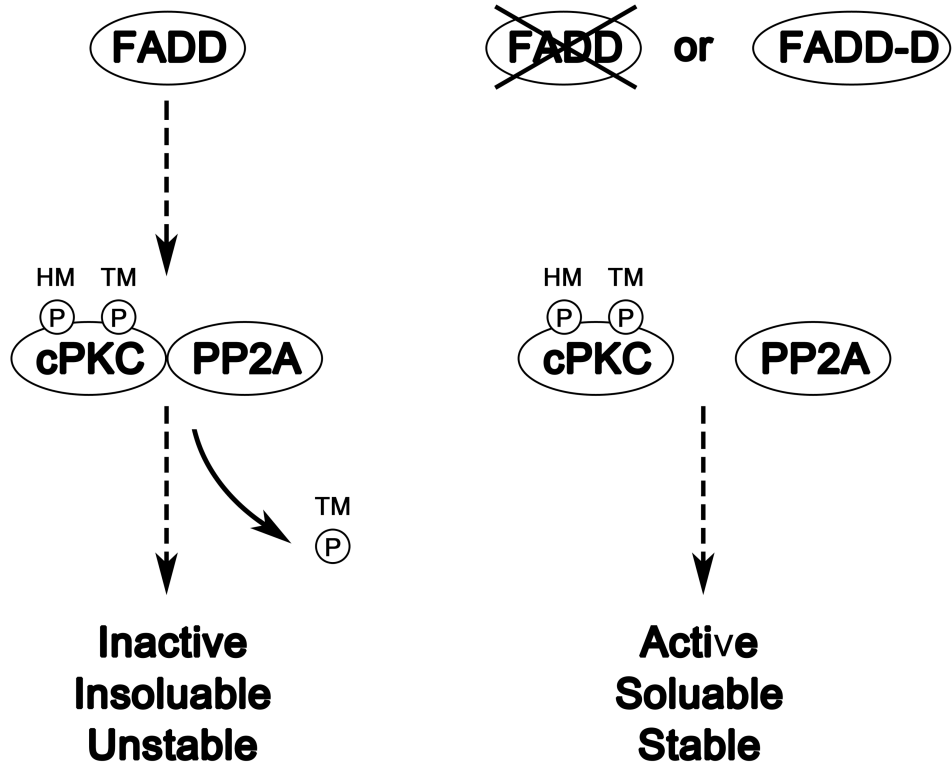

Supplement: supp_M112.342170_jbc.M112.342170-1.pdf [file supp_M112.342170_jbc.M112.342170-1.pdf]
